## Analysis of Whole-Genome Sequencing of SARS-CoV-2 Reveals Recurrent Mutations among Iranian Patients

Mohammad Hadi Abbasian 1, +, Bahar Mahdavi2, +, Mohammadamin Mahmanzar3, +, Samaneh Tokhanbigli 4, Mahsa Mollapour Sisakht5, Bahman Moradi6, Karim Rahimian 7, \*

1. Department of Medical Genetics, National Institute for Genetic Engineering and Biotechnology, Tehran, Iran.
2. Department of Molecular Biotechnology, Cell Science Research Centre, Royan Institute for Biotechnology, ACECR, Isfahan, Iran
3. Department of Bioinformatics, Kish International Campus University of Tehran, Kish, Iran
4. Department of Molecular and Cellular Sciences, Faculty of Advanced Sciences and Technology pharmaceutical Sciences Branch, Islamic Azad University, Tehran, Iran (IAUPS)
5. Department of Biochemistry, Erasmus University Medical Center, P.O. Box 2040, 3000 CA Rotterdam, The Netherlands
6. Department of Biology, faculty of sciences, Shahid Bahonar University of Kerman, Iran
7. Bioinformatics and Computational Omics Lab (BioCOOL), Department of Biophysics, Faculty of Biological Sciences, Tarbiat Modares University, Tehran, Iran.

The authors have withdrawn their manuscript, which means that the paper will no longer be published. This decision was made because the authors used new approaches in analyzing a different sample size, which could result in different findings when compared to the previous version. The authors believe that the new data could be controversial, and therefore, they do not wish for their work to be cited as a reference for any project. Therefore, the authors do not wish this work to be cited as reference for the project. If you have any questions, please contact the corresponding author.
